# Supplementary material for: Scalable synthesis of porous graphite/silicon@pitch carbon nanocomposites derived from wastes of silica fume for high-performance lithium storage
Source: Royal Society of Chemistry journal article supplement (doi:10.1039/d3nj01832f), 2023-01-01
Supplement: d3nj01832f1.pdf [file d3nj01832f1.pdf]

Electronic Supplementary Material (ESI) for New Journal of Chemistry.

## Supporting Information

Scalable synthesis of porous graphite/silicon@pitch carbon  
nanocomposites derived from wastes of silica fume for high-  
performance lithium storage

Bo Wang,<sup>a,b</sup> Yue Li,<sup>\*a,b</sup> Nan Wu,<sup>a</sup> Kun Liu,<sup>a</sup> Liujie Yin,<sup>a</sup> and Ziyi Han,<sup>a</sup>

<sup>a</sup> *School of New Materials and Chemical Engineering, Tangshan University,  
Tangshan 063000, P. R. China.*

<sup>b</sup> *State Key Laboratory of Metastable Materials Science and Technology, Yanshan  
University, Qinhuangdao 066004, P. R. China.*

\* Corresponding author. Tel: +86-315-2010649; Fax: +86-315-2010649.

E-mail address: wangbo@buaa.edu.cn.

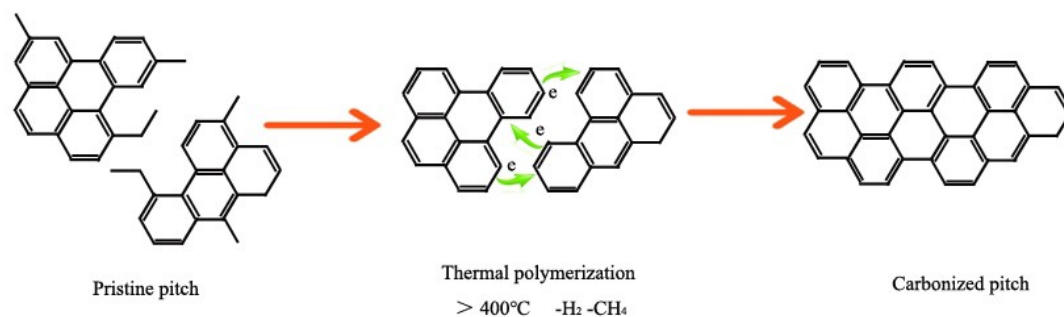

**Fig. S1** Schematic of the transformation mechanism for pitch during carbonization. Carbonization induces bond cleavage and thermal polymerization among pitch molecules, thereby forming graphene-like sheets.

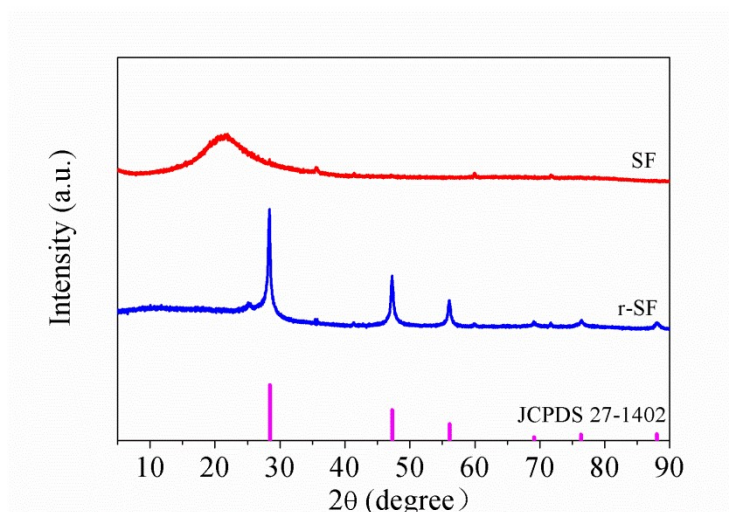

**Fig. S2** XRD patterns of silica fume, r-SF and the standard XRD pattern of graphite.

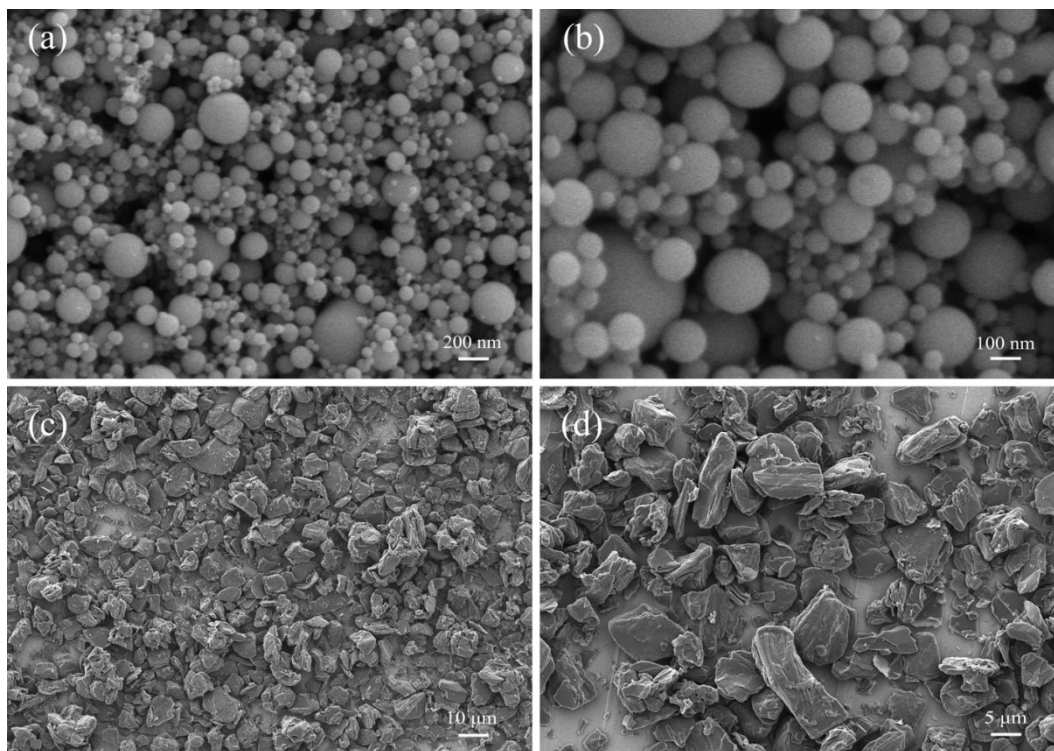

**Fig. S3** SEM images of (a and b) silica fume and (c and d) spent graphite at different magnifications.

**Table S1** Results of element content analysis for the as-synthesized SG/Si@C-5 composites by EDS.

| Element | Weight (%) | Atomic (%) |
|---------|------------|------------|
| C K     | 83.61      | 88.36      |
| O K     | 7.97       | 7.71       |
| Si K    | 8.42       | 3.93       |

**Table S2** Electronic conductivity of the r-SF, SG/Si@C-2, SG/Si@C-4, and SG/Si@C-5 composites.

| Sample name | Electronic conductivity ( $\sigma$ , S cm <sup>-1</sup> ) |
|-------------|-----------------------------------------------------------|
| r-SF        | $1.27 \times 10^{-5}$                                     |
| SG/Si@C-2   | $4.62 \times 10^{-3}$                                     |
| SG/Si@C-4   | $3.08 \times 10^{-2}$                                     |
| SG/Si@C-5   | $6.95 \times 10^{-2}$                                     |
